# Supplementary material for: Comparison of CaO-NPs and Chicken Eggshell-Derived CaO in the Production of Biodiesel from Schinziophyton rautanenii (Mongongo) Nut Oil
Source: Hindawi journal article supplement (doi:10.1155/2021/6663722), 2021-02-26
Supplement: f1 [file 6663722.f1.docx]

**Supplementary Information**

**Comparison of CaO-NPs and Chicken Egg Shell Derived CaO in the Production of Biodiesel from *schinziophyton rautanenii* (mongongo) nut oil.**

Keene C. Mmusi1,2 Sebusi Odisitse1 and Florence Nareetsile3

1Botswana International University of Science and Technology, Department of Chemistry and Forensic Sciences, Private Bag 16, Palapye, Botswana

2Botho University, Department of Applied Sciences, Gaborone, Botswana, P O Box 501564, Gaborone, Botswana

3University of Botswana, Chemistry Department, Private bag 0704, Gaborone, Botswana

Correspondence should be addressed to Sebusi Odisitse; sebusi.odisitse@gmail.com

Table of Contents

[1. Powder XRD characterization 2](#_Toc50499311)

[1.1 Powder XRD spectra of Chicken eggshell ash derived CaO 2](#_Toc50499312)

[1.2 Powder XRD Spectra Calcium Oxide Nanoparticle 2](#_Toc50499313)

[2. GC-MS Characterization of MMEs 3](#_Toc50499314)

[2.1 GC-MS spectra MMEs Using Chicken eggshell ash derived CaO 3](#_Toc50499315)

[2.2 GC-MS Spectra of MMEs Using Calcium Oxide Nanoparticles 5](#_Toc50499316)

[3. Statics Calculations 8](#_Toc50499317)

[3.1 Sample t-test calculations of Chicken eggshell ash derived CaO and Calcium Oxide nanoparticles 8](#_Toc50499318)

# Powder XRD characterization

## **Powder XRD spectra of Chicken eggshell ash derived CaO**


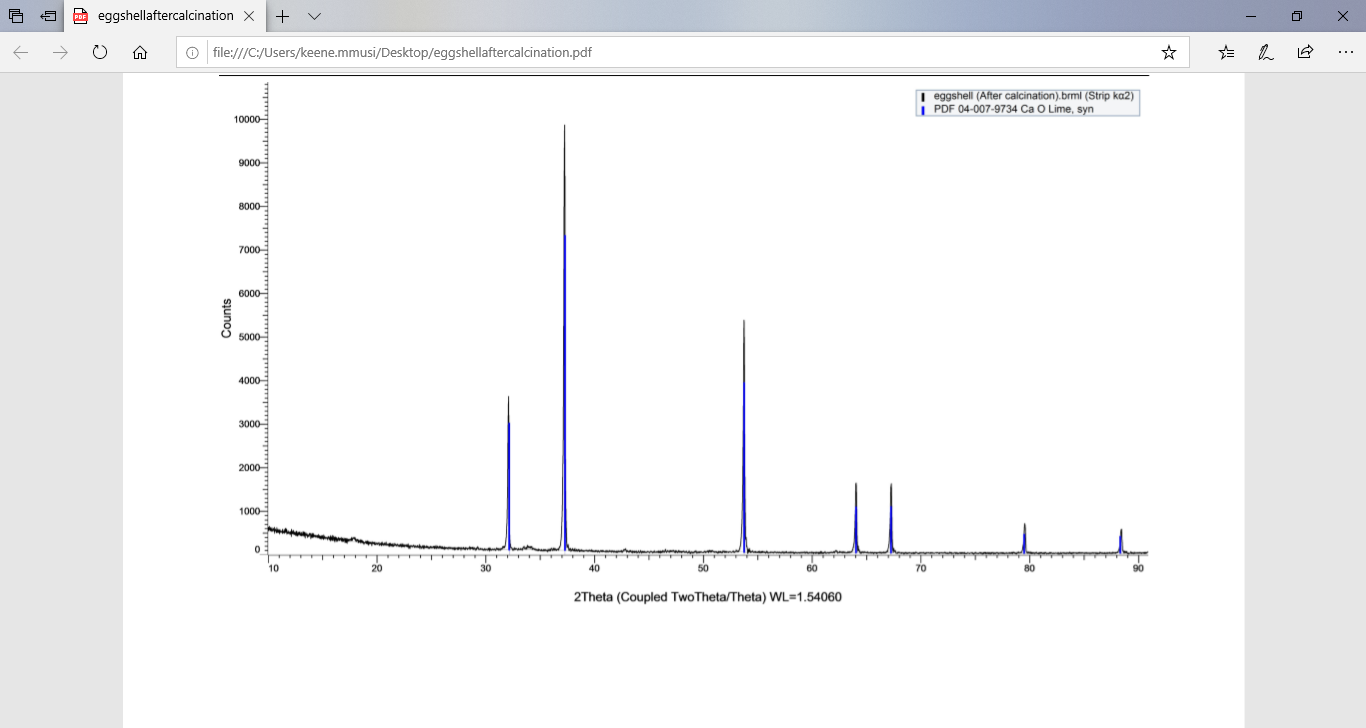


Figure 1: The XRD pattern of chicken eggshell ash derived CaO which were calcined at 800 ˚C

## **1.2 Powder XRD Spectra Calcium Oxide Nanoparticle**

##


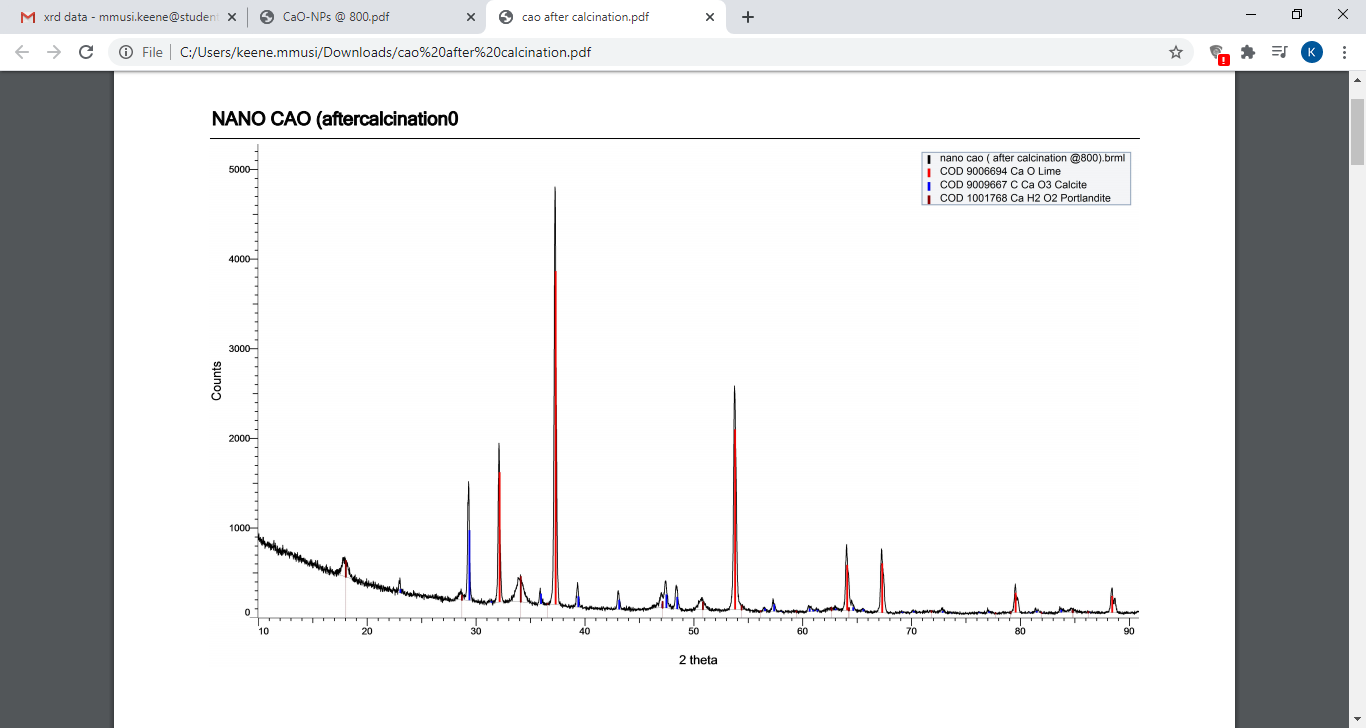


Figure 2: XRD pattern of CaO-NPs which were calcined at 800 ˚C

# GC-MS Characterization of MMEs

## **GC-MS spectra MMEs Using Chicken eggshell ash derived CaO**

Figure 3: Shows the MMEs at a retention time of 15.93 mins

Figure 4: Shows the MMEs at a retention time of 18.22 mins

Figure 5: Shows the MMEs at a retention time of 18.61 mins

Figure 6: Shows the MMEs at a retention time of 20.24 mins

Figure 7: Shows the MMEs at a retention time of 23.60 mins

## **GC-MS Spectra of MMEs Using Calcium Oxide Nanoparticles**

Figure 8: Shows the MMEs at a retention time of 15.94 mins

Figure 9: Shows the MMEs at a retention time of 18.23 mins

Figure 10: Shows the MMEs at a retention time of 20.24 mins

Figure 11: Shows the MMEs at a retention time of 20.85 mins

Figure 12: Shows the MMEs at a retention time of 23.59 mins

# Statistical Calculations

## **Sample t-test calculations of Chicken eggshell ash derived CaO and Calcium Oxide nanoparticles**

Table 1: Sample t-test calculations of the catalysts for variable 1 (Chicken eggshell ash derived CaO) and variable 2 (CaO-NPs)

| t-Test: Paired Two Sample for Means | | |
| --- | --- | --- |
|  | *Variable 1* | *Variable 2* |
| Mean | 82.73333 | 84.73333 |
| Variance | 0.413333 | 0.413333 |
| Observations | 3 | 3 |
| Pearson Correlation | -0.74194 |  |
| Hypothesized Mean Difference | 0 |  |
| df | 2 |  |
| t Stat | -2.88675 |  |
| *P(T<=t)* one-tail | 0.050987 |  |
| t Critical one-tail | 2.919986 |  |
| *P(T<=t)* two-tail | 0.101973 |  |
| t Critical two-tail | 4.302653 |  |
